# Supplementary material
Source: publisher site journal article supplement (https://www.dovepress.com/article/256278)
Supplement: Supplementary file 1 [file get_supplementary_file.php]

**Supplemental Table 1.** Correlation analysis between change in serum BDNF levels and the corresponding changes in HAMD-17 scores at each assessment point

|  | Baseline HAMD-17 scores | Reduction in HAMD-17 scores after the first session of NET | Reduction in HAMD-17 scores after the third sessions of NET | Reduction in HAMD-17 scores after the sixth session of NET |
| --- | --- | --- | --- | --- |
| Baseline BDNF serum levels | r=0.15 | r=0.13 | r=0.11 | r=0.07 |
| *p=0.53* | *p=0.58* | *p=0.63* | *p=0.78* |
| Change in serum BDNF levels | r=-0.09 | r=0.07 | r=0.07 | *r*=-0.25 |
| *p*=0.72 | *p*=0.79 | p=0.77 | *p=0.30* |
| Abbreviations: BDNF=brain-derived neurotrophic factor; NET=nonconvulsive electrotherapy; HAMD-17=17-item [Hamilton Depression Rating Scale](https://www.sciencedirect.com/topics/medicine-and-dentistry/hamilton-rating-scale-for-depression); r=Pearson’s coefficient of correlation. | | | | |
